# Supplementary material for: Risk of cancer in patients on insulin glargine and other insulin analogues in comparison with those on human insulin: results from a large population-based follow-up study
Source: PubMed Central journal article supplement — Diabetologia. 2011 Sep 29;55(1):51–62. doi: 10.1007/s00125-011-2312-4 (PMC3228952; doi:10.1007/s00125-011-2312-4), 2011-09-29
Supplement: 125_2011_2312_MOESM5_ESM.pdf [file 125_2011_2312_MOESM5_ESM.pdf]

**Supplemental Table 4** Risk of specific cancer in patients using insulin glargine or other insulin analogues in comparison with those using human insulin (fixed analysis)

| Full model <sup>a</sup>                                       | Insulin glargine |    |      |            | Other insulin analogues |    |      |            | Human insulin |
|---------------------------------------------------------------|------------------|----|------|------------|-------------------------|----|------|------------|---------------|
|                                                               | IR               | n  | HR   | 95% CI     | IR                      | n  | HR   | 95% CI     | IR            |
| Colon cancer                                                  |                  |    |      |            |                         |    |      |            |               |
| Full                                                          | 1.65             | 13 | 0.61 | 0.43, 0.88 | 2.36                    | 38 | 0.87 | 0.78, 0.97 | 2.83          |
| Full model, adjusted for use of OGLD (time-dependent)         |                  |    |      |            |                         |    |      |            |               |
| Biguanide                                                     |                  |    | 0.74 | 0.64, 0.87 |                         |    | 0.92 | 0.85, 0.99 |               |
| SU                                                            |                  |    | 0.74 | 0.64, 0.86 |                         |    | 0.91 | 0.84, 0.99 |               |
| Other OGLD                                                    |                  |    | 0.74 | 0.64, 0.87 |                         |    | 0.92 | 0.85, 0.99 |               |
| Full model + average DDD                                      |                  |    | 0.64 | 0.45, 0.90 |                         |    | 0.73 | 0.64, 0.84 |               |
| Full model, stratified for dose of first insulin prescription |                  |    |      |            |                         |    |      |            |               |
| < Median                                                      |                  | 0  | –    |            |                         | 0  | –    |            |               |
| Median                                                        |                  | 10 | 0.29 | 0.16, 0.53 |                         | 29 | 0.70 | 0.60, 0.82 |               |
| > Median                                                      |                  | 3  | –    |            |                         | 9  | 0.76 | 0.58, 1.00 |               |
| Full model including a latency time of 1 year <sup>b</sup>    | 1.03             | 8  | 0.83 | 0.54, 1.28 | 0.94                    | 15 | 0.88 | 0.77, 1.00 | 1.71          |
| Bladder cancer                                                |                  |    |      |            |                         |    |      |            |               |
| Full                                                          | 1.02             | 8  | 1.77 | 1.04, 3.00 | 0.93                    | 15 | 0.69 | 0.57, 0.84 | 1.00          |
| Full model, adjusted for use of OGLD (time-dependent)         |                  |    |      |            |                         |    |      |            |               |
| Biguanide                                                     |                  |    | 0.82 | 0.67, 1.01 |                         |    | 0.84 | 0.75, 0.95 |               |
| SU                                                            |                  |    | 0.83 | 0.68, 1.01 |                         |    | 0.84 | 0.75, 0.95 |               |
| Other OGLD                                                    |                  |    | 0.82 | 0.67, 1.01 |                         |    | 0.84 | 0.74, 0.95 |               |
| Full model + average DDD                                      |                  |    | 1.26 | 0.63, 2.49 |                         |    | 0.61 | 0.47, 0.78 |               |
| Full model, stratified for dose of first insulin prescription |                  |    |      |            |                         |    |      |            |               |
| < Median                                                      |                  | 0  | –    |            |                         | 0  | –    |            |               |
| Median                                                        |                  | 7  | 2.26 | 1.17, 4.39 |                         | 11 | 0.49 | 0.36, 0.66 |               |
| > Median                                                      |                  | 1  | –    |            |                         | 4  | 0.77 | 0.57, 1.02 |               |
| Full model including a latency time of 1 year <sup>b</sup>    | 0.64             | 5  | 2.06 | 0.83, 5.12 | 0.69                    | 11 | 0.84 | 0.69, 1.02 | 0.74          |
| Respiratory tract cancer                                      |                  |    |      |            |                         |    |      |            |               |
| Full                                                          | 1.53             | 12 | 0.92 | 0.74, 1.16 | 2.11                    | 34 | 0.70 | 0.62, 0.78 | 1.74          |
| Full model, adjusted for use of OGLD (time-dependent)         |                  |    |      |            |                         |    |      |            |               |
| Biguanide                                                     |                  |    | 0.90 | 0.71, 1.13 |                         |    | 0.86 | 0.78, 0.94 |               |
| SU                                                            |                  |    | 0.81 | 0.61, 1.06 |                         |    | 0.85 | 0.78, 0.93 |               |

|                                                               |      |    |      |            |      |    |      |            |      |
|---------------------------------------------------------------|------|----|------|------------|------|----|------|------------|------|
| Other OGLD                                                    |      |    | 0.94 | 0.75, 1.19 |      |    | 0.85 | 0.78, 0.93 |      |
| Full model + average DDD                                      |      |    | 0.57 | 0.42, 0.79 |      |    | 0.70 | 0.62, 0.78 |      |
| Full model, stratified for dose of first insulin prescription |      |    |      |            |      |    |      |            |      |
| < Median                                                      |      | 0  | –    |            |      | 1  | –    |            |      |
| Median                                                        |      | 8  | 0.72 | 0.44, 1.18 |      | 21 | 0.69 | 0.58, 0.82 |      |
| > Median                                                      |      | 4  | 0.88 | 0.62, 1.24 |      | 12 | 0.83 | 0.73, 0.95 |      |
| Full model including a latency time of 1 year <sup>b</sup>    | 1.16 | 9  | 1.06 | 0.81, 1.39 | 1.25 | 20 | 0.77 | 0.68, 0.88 | 1.29 |
| Prostate cancer                                               |      |    |      |            |      |    |      |            |      |
| Full                                                          | 1.06 | 4  | 1.17 | 0.84, 1.62 | 1.26 | 10 | 0.82 | 0.69, 0.97 | 1.74 |
| Full model, adjusted for use of OGLD (time-dependent)         |      |    |      |            |      |    |      |            |      |
| Biguanide                                                     |      |    | 1.24 | 0.81, 1.57 |      |    | 0.82 | 0.69, 0.97 |      |
| SU                                                            |      |    | 1.18 | 0.85, 1.63 |      |    | 0.76 | 0.63, 0.93 |      |
| Other OGLD                                                    |      |    | 1.21 | 0.85, 1.73 |      |    | 0.51 | 0.37, 0.69 |      |
| Full model + average DDD                                      |      |    | 1.01 | 0.61, 1.67 |      |    | 0.98 | 0.81, 1.18 |      |
| Full model, stratified for dose of first insulin prescription |      |    |      |            |      |    |      |            |      |
| < Median                                                      |      | 0  | –    |            |      | 0  | –    |            |      |
| Median                                                        |      | 3  | 0.96 | 0.57, 1.64 |      | 6  | 0.78 | 0.46, 1.31 |      |
| > Median                                                      |      | 1  | –    |            |      | 4  | 0.87 | 0.65, 1.16 |      |
| Full model including a latency time of 1 year <sup>b</sup>    | 0.76 | 3  | 2.19 | 1.03, 4.66 | 0.64 | 5  | 0.84 | 0.68, 1.03 | 1.28 |
| Breast cancer                                                 |      |    |      |            |      |    |      |            |      |
| Full                                                          | 5.40 | 21 | 1.39 | 1.08, 1.79 | 2.81 | 23 | 1.00 | 0.93, 1.09 | 2.88 |
| Full model, adjusted for use of OGLD (time-dependent)         |      |    |      |            |      |    |      |            |      |
| Biguanide                                                     |      |    | 1.40 | 1.09, 1.79 |      |    | 1.00 | 0.92, 1.09 |      |
| SU                                                            |      |    | 1.46 | 1.12, 1.90 |      |    | 1.01 | 0.93, 1.09 |      |
| Other OGLD                                                    |      |    | 1.59 | 1.21, 2.08 |      |    | 1.03 | 0.94, 1.11 |      |
| Full model + average DDD                                      |      |    | 1.43 | 1.08, 1.88 |      |    | 0.94 | 0.86, 1.03 |      |
| Full model, stratified for dose of first insulin prescription |      |    |      |            |      |    |      |            |      |
| < Median                                                      |      | 1  | –    |            |      | 2  | –    |            |      |
| Median                                                        |      | 13 | 1.49 | 1.12, 1.98 |      | 15 | 1.10 | 0.96, 1.26 |      |
| > Median                                                      |      | 7  | 1.01 | 0.62, 1.63 |      | 6  | 0.28 | 0.11, 0.71 |      |
| Full model including a latency time of 1 year <sup>b</sup>    | 2.35 | 9  | 2.19 | 1.44, 3.33 | 1.48 | 12 | 1.01 | 0.92, 1.11 | 2.36 |

<sup>a</sup>In the full model, adjustments were made for age at first insulin prescription, sex, calendar time, number of unique drugs used in the year before start of insulin and number of hospitalisations in the year before start of insulin. Days of prior OGLD use, number of days of OGLD use as of January 1998.

<sup>b</sup>Model included a 1 year latency period: exposure was cumulated up till one year prior to the date of cancer diagnosis  
*n*, number of events; SU, sulfonylurea derivative
