# Supplementary material for: Risk of cancer in patients on insulin glargine and other insulin analogues in comparison with those on human insulin: results from a large population-based follow-up study
Source: PubMed Central journal article supplement — Diabetologia. 2011 Sep 29;55(1):51–62. doi: 10.1007/s00125-011-2312-4 (PMC3228952; doi:10.1007/s00125-011-2312-4), 2011-09-29

### Supplemental Figure 2

Adherence to other insulin analogues, presented separately for those who died, those who got diagnosed with cancer and those who got censored at the end of the study.

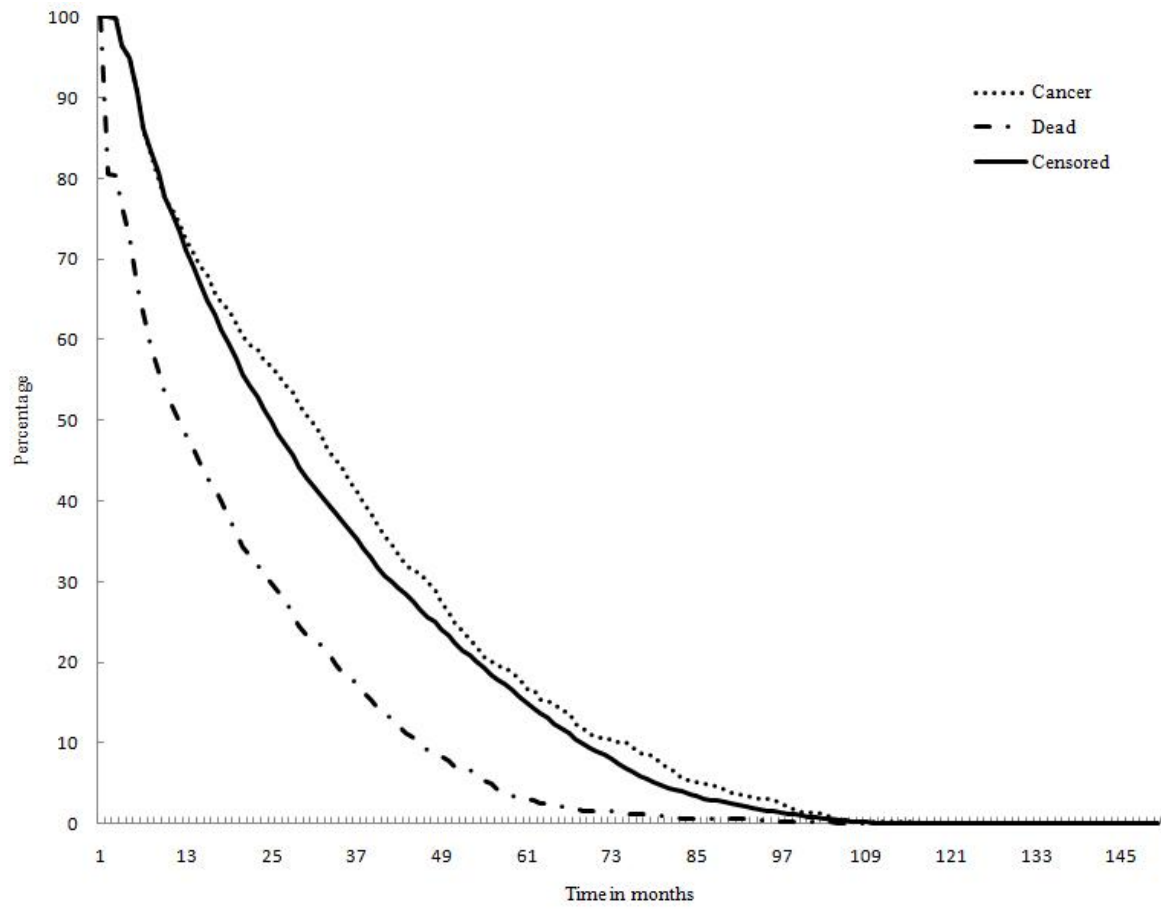

Supplement: 125_2011_2312_MOESM7_ESM.pdf [file 125_2011_2312_MOESM7_ESM.pdf]
