# Supplementary material for: Risk of cancer in patients on insulin glargine and other insulin analogues in comparison with those on human insulin: results from a large population-based follow-up study
Source: Springer Nature journal article supplement (doi:10.1007/s00125-011-2312-4), 2011-09-28
Supplement: MOESM2 [file 8090342]

**Supplemental Table 1:** Categorisation of different types of insulin.

| Category          |                         | ATC code included | Product Name      | Duration of acting after administration |
|-------------------|-------------------------|-------------------|-------------------|-----------------------------------------|
| Insulin analogues | Insulin glargine        | A10AE04           | Insulin Glargine  | Long                                    |
|                   | Other insulin analogues | A10AB04           | Insulin Lispro    | Fast                                    |
|                   |                         | A10AB05           | Insulin Aspart    |                                         |
|                   |                         | A10AB06           | Insulin Glulisine |                                         |
|                   |                         | A10AC04           | Insulin Lispro    | Intermediate                            |
|                   |                         | A10AD04           | Insulin Lispro    | Combination fast and intermediate       |
|                   |                         | A10AD05           | Insulin Aspart    |                                         |
|                   |                         | A10AE05           | Insulin Detemir   | Long                                    |
| Human Insulin     | Human insulin           | A10AB01           | Human Insulin     | Fast                                    |
|                   |                         | A10AC01           | Human Insulin     | Intermediate                            |
|                   |                         | A10AD01           | Human Insulin     | Combination fast and intermediate       |
|                   |                         | A10AE01           | Human Insulin     | Long                                    |
