# Supplementary material for: Risk of cancer in patients on insulin glargine and other insulin analogues in comparison with those on human insulin: results from a large population-based follow-up study
Source: Springer Nature journal article supplement (doi:10.1007/s00125-011-2312-4), 2011-09-28
Supplement: MOESM3 [file 8090342]

**Supplemental Table 2:** Number of days of Oral Glucose Lowering Drug (OGLD) use prior start of insulin; stratified per year in which insulin therapy was started.

| <i>No. of days of OGLD use in the year prior to start of insulin (median, inter-quartile range)</i>              |                        |                           |                                  |                        |
|------------------------------------------------------------------------------------------------------------------|------------------------|---------------------------|----------------------------------|------------------------|
| Year of start with insulin                                                                                       | Number of participants | Users of insulin glargine | Users of other insulin analogues | Users of human insulin |
| 2000                                                                                                             | 1,009                  | 318 (226 – 340)           | 315 (233 – 345)                  | 326 (283 – 351)        |
| 2001                                                                                                             | 1,827                  | 330 (298 – 354)           | 321 (275 – 350)                  | 326 (282 – 350)        |
| 2002                                                                                                             | 1,757                  | 326 (276 – 349)           | 323 (287 – 351)                  | 329 (287 – 349)        |
| 2003                                                                                                             | 2,095                  | 331 (300 – 352)           | 326 (288 – 349)                  | 326 (278 – 350)        |
| 2004                                                                                                             | 2,391                  | 328 (292 – 350)           | 324 (281 – 347)                  | 327 (281 – 352)        |
| 2005                                                                                                             | 2,341                  | 329 (294 – 351)           | 323 (280 – 350)                  | 323 (258 – 349)        |
| 2006                                                                                                             | 2,413                  | 324 (273 – 350)           | 318 (190 – 349)                  | 322 (278 – 348)        |
| 2007                                                                                                             | 2,736                  | 317 (252 – 349)           | 314 (104 – 344)                  | 309 (196 – 344)        |
| 2008                                                                                                             | 2,768                  | 322 (276 – 349)           | 313 (120 – 345)                  | 314 (164 – 347)        |
| <i>No. of days of OGLD use prior to start of insulin as of January first 1998 (median, inter-quartile range)</i> |                        |                           |                                  |                        |
| Year of start with insulin                                                                                       | Number of participants | Users of insulin glargine | Users of other insulin analogues | Users of human insulin |
| 2000                                                                                                             | 1,009                  | 816 (245 – 937)           | 693 (272 – 919)                  | 823 (236 – 940)        |
| 2001                                                                                                             | 1,827                  | 1,050 (393 – 1,205)       | 841 (400 – 1,163)                | 1,064 (392 – 1,211)    |
| 2002                                                                                                             | 1,757                  | 1,278 (539 – 1,539)       | 1,110 (482 – 1,558)              | 1,281 (554 – 1,538)    |
| 2003                                                                                                             | 2,095                  | 1,195 (705 – 2,046)       | 1,393 (607 – 1,860)              | 1,327 (454 – 1,869)    |
| 2004                                                                                                             | 2,391                  | 1,456 (621 – 2,212)       | 1,416 (489 – 2,168)              | 1,389 (455 – 2,199)    |
| 2005                                                                                                             | 2,341                  | 1,632 (776 – 2,495)       | 1,486 (485 – 2,505)              | 1,495 (429 – 2,448)    |
| 2006                                                                                                             | 2,413                  | 1,760 (502 – 2,676)       | 1,219 (233 – 2,470)              | 1,635 (481 – 2,542)    |
| 2007                                                                                                             | 2,736                  | 1,566 (311 – 2,672)       | 1,113 (83 – 2,561)               | 1,171 (63 – 2,481)     |
| 2008                                                                                                             | 2,768                  | 1,489 (483 – 2,849)       | 961 (105 – 2,396)                | 1,375 (134 – 2,697)    |
