# Supplementary material for: Risk of cancer in patients on insulin glargine and other insulin analogues in comparison with those on human insulin: results from a large population-based follow-up study
Source: Springer Nature journal article supplement (doi:10.1007/s00125-011-2312-4), 2011-09-28
Supplement: MOESM4 [file 8090342]

**Supplemental Table 3** Risk of malignancies in patients using insulin glargine or other insulin analogues in comparison with those using human insulin (fixed analysis)

| Covariables <sup>a</sup> included in the model                      | Insulin glargine |            | Other insulin analogues |            |
|---------------------------------------------------------------------|------------------|------------|-------------------------|------------|
|                                                                     | HR               | 95% CI     | HR                      | 95% CI     |
| None                                                                | 0.73             | 0.69, 0.77 | 0.80                    | 0.77, 0.82 |
| Stratified for dose of first insulin prescription                   |                  |            |                         |            |
| < Median                                                            | 0.67             | 0.52, 0.88 | 0.87                    | 0.76, 0.99 |
| Median                                                              | 0.73             | 0.67, 0.78 | 0.76                    | 0.73, 0.80 |
| > Median                                                            | 0.63             | 0.56, 0.71 | 0.87                    | 0.83, 0.92 |
| Age, sex                                                            | 0.74             | 0.70, 0.78 | 0.80                    | 0.78, 0.83 |
| Full model: age, sex, calendar time, hospitalisations, unique drugs | 0.77             | 0.73, 0.82 | 0.85                    | 0.82, 0.88 |
| Full model adjusted for time since cessation <sup>b</sup>           | 0.73             | 0.69, 0.78 | 0.83                    | 0.80, 0.86 |
| Full model adjusted for days of prior OGLD use                      |                  |            |                         |            |
| < 1 year OGLD use                                                   | 0.75             | 0.64, 0.89 | 0.81                    | 0.75, 0.88 |
| > 1 year OGLD use                                                   | 0.80             | 0.75, 0.86 | 0.88                    | 0.86, 0.92 |
| Full model, adjusted for use of OGLD (time-dependent)               |                  |            |                         |            |
| Biguanide                                                           | 0.77             | 0.73, 0.82 | 0.85                    | 0.82, 0.88 |
| SU                                                                  | 0.77             | 0.73, 0.82 | 0.85                    | 0.82, 0.88 |
| Other OGLD                                                          | 0.77             | 0.73, 0.82 | 0.85                    | 0.82, 0.88 |
| Full model adjusted for average DDD                                 | 0.77             | 0.72, 0.82 | 0.85                    | 0.82, 0.88 |
| Full model, stratified for dose of first insulin prescription       |                  |            |                         |            |
| < Median                                                            | 0.65             | 0.49, 0.86 | 0.88                    | 0.76, 1.02 |
| Median                                                              | 0.78             | 0.72, 0.84 | 0.81                    | 0.77, 0.85 |
| > Median                                                            | 0.66             | 0.58, 0.75 | 0.93                    | 0.88, 0.99 |
| Full model including a latency time of 1 year <sup>c</sup>          | 0.75             | 0.70, 0.81 | 0.87                    | 0.84, 0.91 |

<sup>a</sup>Covariables: age, age at first insulin prescription; calendar time, time since inclusion of participant in PHARMO RLS; hospitalisations, number of hospitalisations in the year prior to start of insulin; unique drugs, number of unique drugs dispensed in the year prior to start of insulin; days of prior OGLD use, number of days of OGLD use as of January 1998; average DDD, dose calculated over all previous insulin prescriptions

<sup>b</sup>Time since cessation of insulin glargine, other insulin analogues and/or human insulin in days

<sup>c</sup>Model included a 1 year latency period: exposure was cumulated up till one year prior to the date of cancer diagnosis; incidence rate (no. of cancer diagnoses/1,000 patient years) for insulin glargine 7.20; for other insulin analogues 7.90 and for human insulin 9.23. SU, sulfonylurea derivative
