# Supplementary material for: Risk of cancer in patients on insulin glargine and other insulin analogues in comparison with those on human insulin: results from a large population-based follow-up study
Source: Springer Nature journal article supplement (doi:10.1007/s00125-011-2312-4), 2011-09-28

### Supplemental Figure 1

Adherence to insulin glargine, presented separately for those who died, those who got diagnosed with cancer and those who got censored at the end of the study.

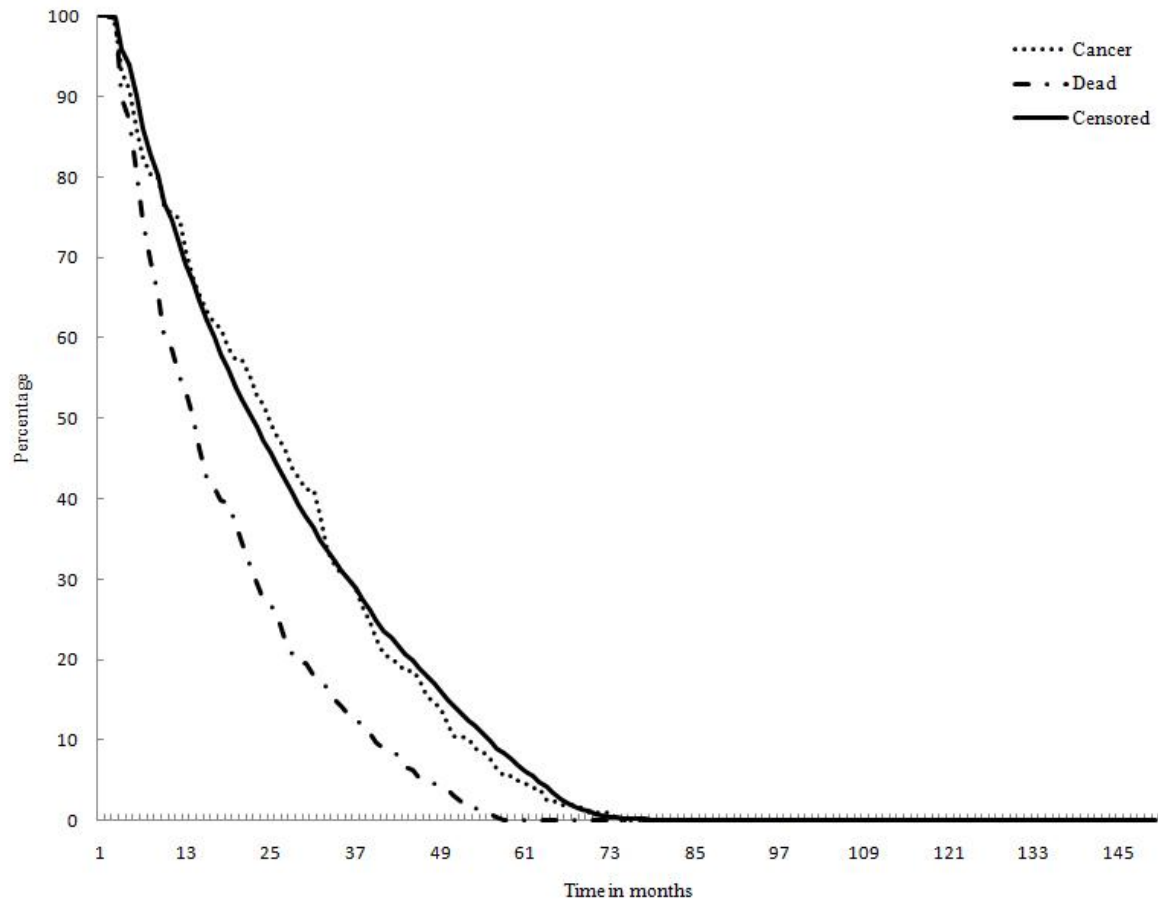

Supplement: MOESM6 [file 8090342]
